# Supplementary material
Source: PubMed Central journal article supplement (PMC11404688)
Supplement: NIHMS2016798-supplement-supp_with_map.pdf [file NIHMS2016798-supplement-supp_with_map.pdf]

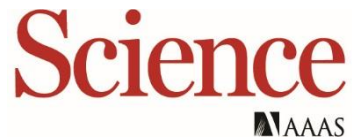

## Supplementary Materials for

### **A phage tail–like bacteriocin suppresses competitors in metapopulations of pathogenic bacteria**

Talia Backman *et al.*

Corresponding authors: Hernán A. Burbano, h.burbano@ucl.ac.uk; Talia L. Karasov, t.karasov@utah.edu

*Science* **384**, eado0713 (2024)  
DOI: 10.1126/science.ado0713

#### **The PDF file includes:**

Figs. S1 to S12  
Tables S1 to S5

#### **Other Supplementary Material for this manuscript includes the following:**

MDAR Reproducibility Checklist

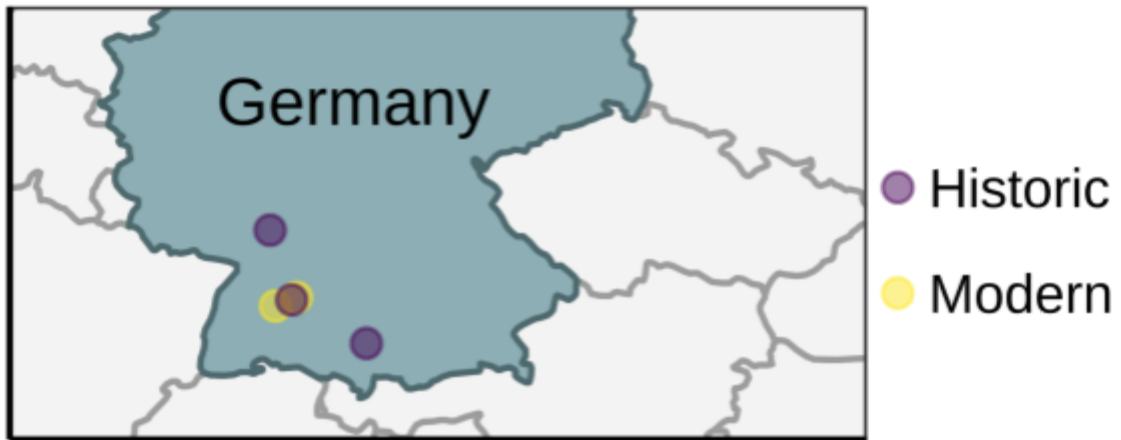

**Figure S1.** The two modern and three historic collection sites in Southwestern Germany.

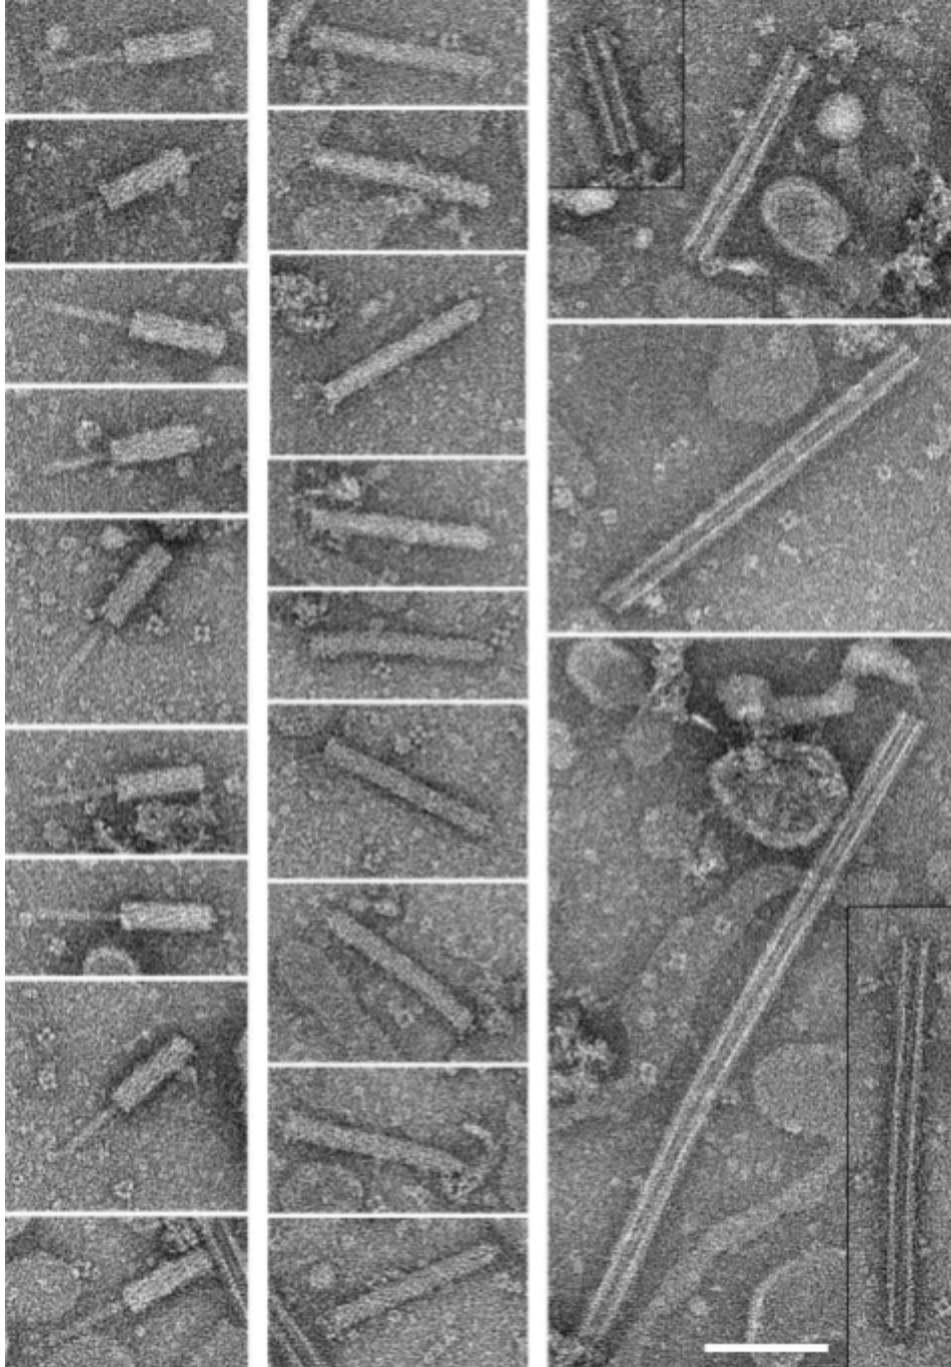

**Figure S2.** TEM images of p25.A12 contracted tailocins (left column), uncontracted tailocins (center column), and phage-like hollow tubes (right column). In the central column, the baseplate end of the tailocin faces left. The hollow tubes had highly variable lengths, average  $404 (\pm 153)$  nm ( $n = 14$ ). Scale bar, 100 nm.

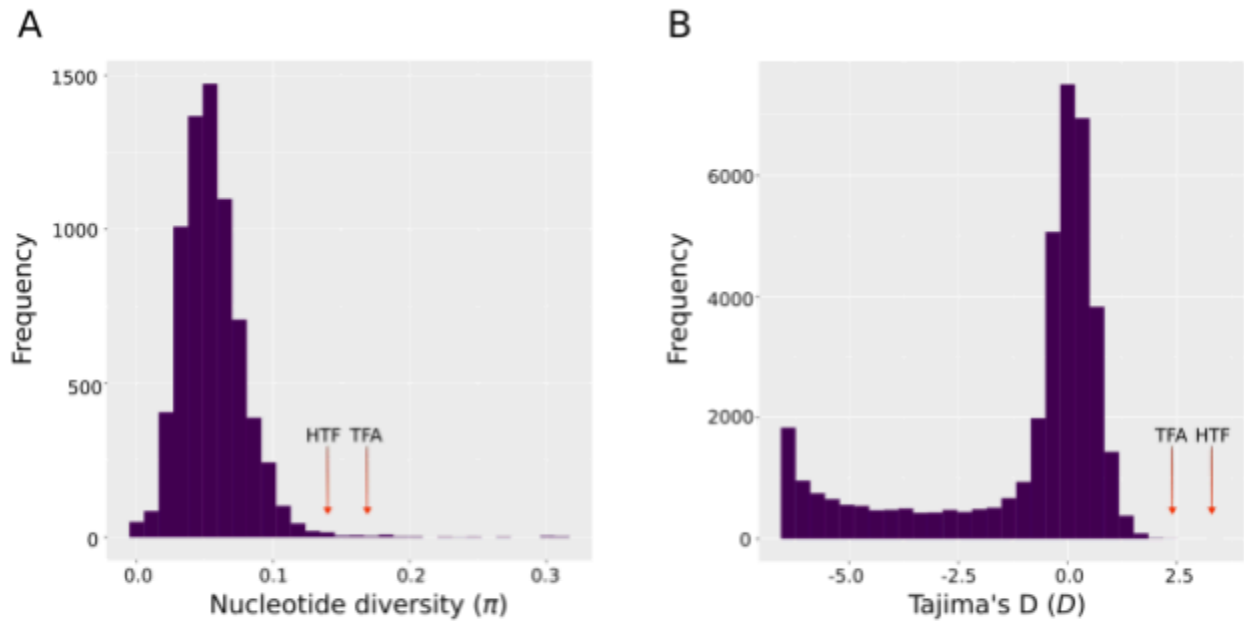

**Figure S3 The tail fiber assembly gene and hypothetical tail fiber are evolving quicker than the rest of the bacterial genome.** The distribution of **A.** nucleotide diversity ( $\pi$ ) and **B.** Tajima's D ( $D$ ) for all core genes in the 1,399 ATUE5 genomes. The TFA and HTF genes (red arrows) have significantly higher  $\pi$  and  $D$  compared to the rest of the core genes.

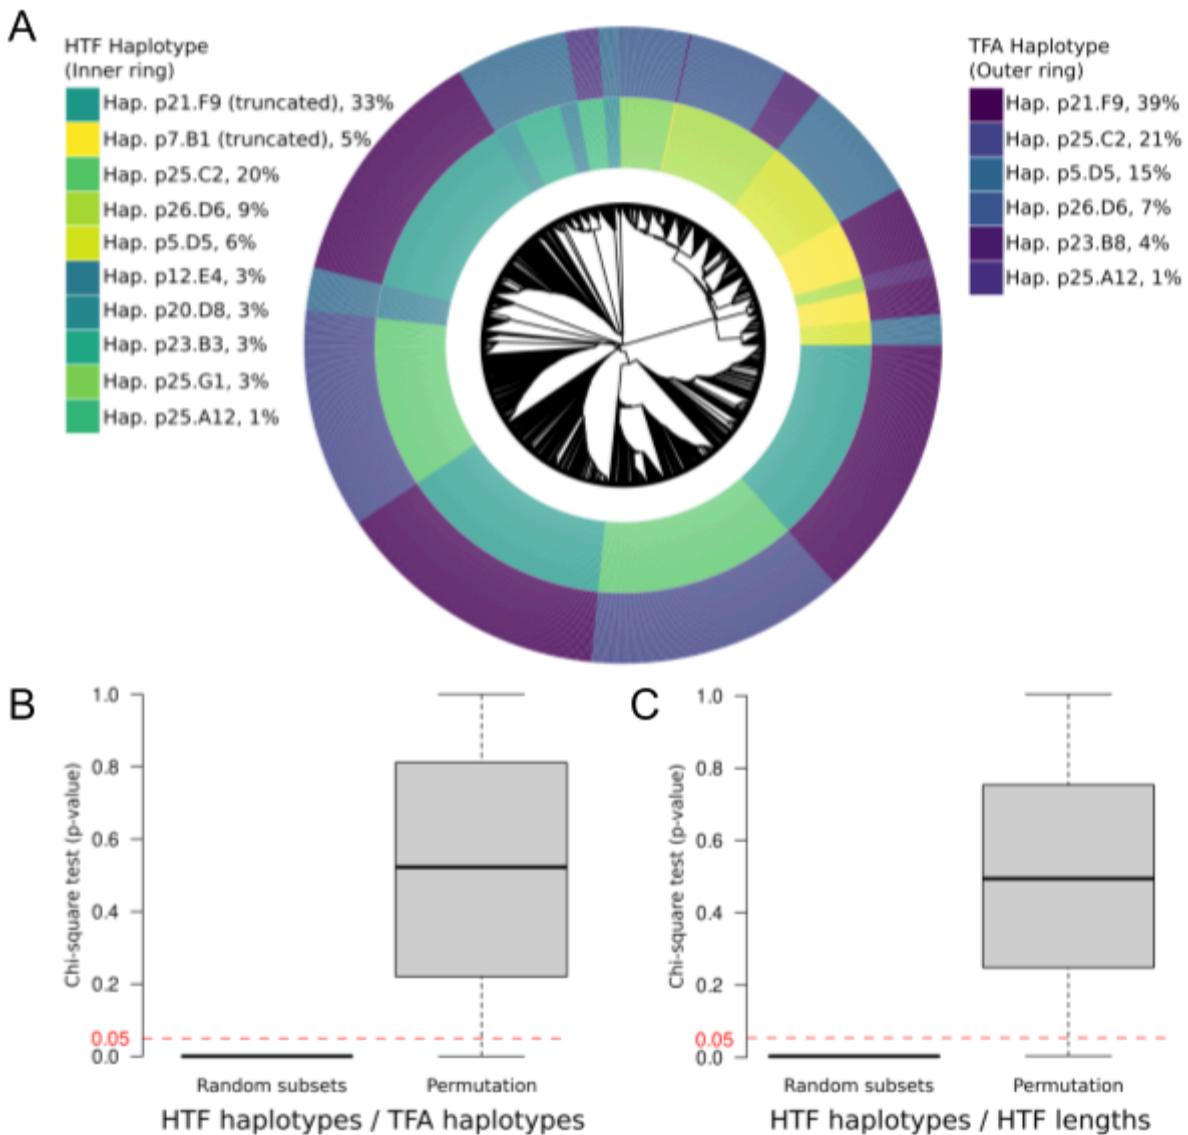

**Figure S4. Associations between Tail Fiber Assembly (TFA) and Hypothetical Tail Fiber (HTF) haplotypes are significant.** **A.** Maximum likelihood concatenated core genome phylogeny of 1,399 pathogenic pseudomonads that co-occur in the *Arabidopsis thaliana* phyllosphere with the HTF and TFA haplotypes plotted in the inner and outer rings. **B-C.** Each box plot represents a distribution of 1000 Chi-square test p-values drawn from random draws of pairs between TFA and HTF haplotypes and data sets for which HTF values were randomly permuted. Associations were tested between the two protein haplotypes (A) and between HTF haplotypes and TFA gene lengths (B).

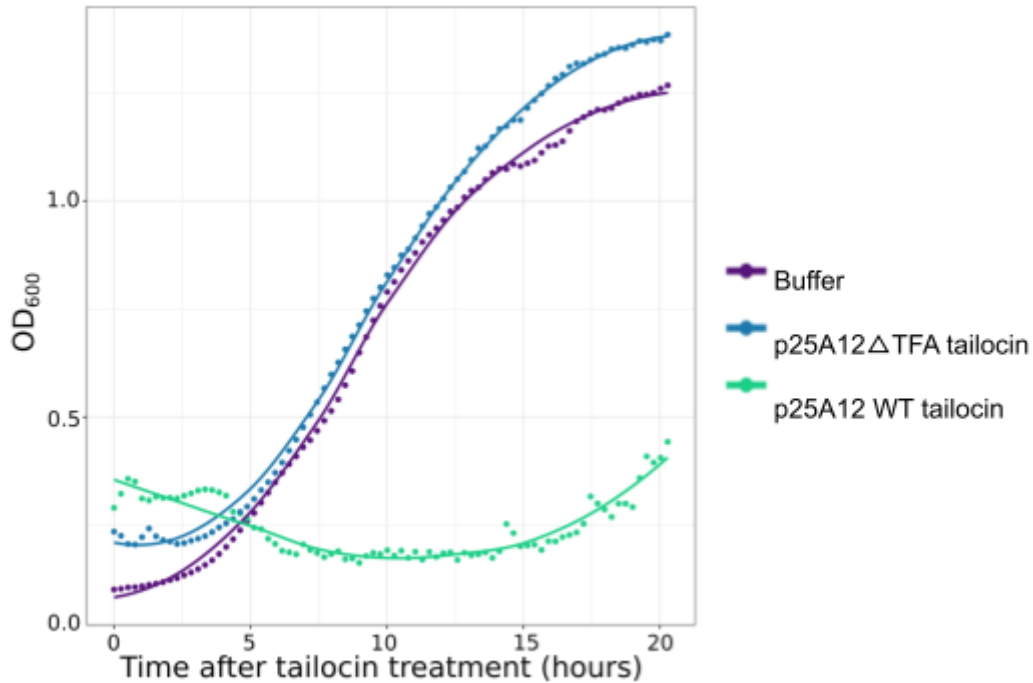

**Figure S5. The tail fiber assembly gene was successfully knocked out and the knockout strain loses killing ability.** A known sensitive strain to the tailocin (p25.C2) was grown and the OD<sub>600</sub> was measured for 20 hours. Treatments included p25.A12 WT purified tailocin, p25.A12 mutant purified tailocin, and a buffer control. Each treatment was done in two independent replicates. Each dot represents the average OD<sub>600</sub> with a trendline for each treatment.

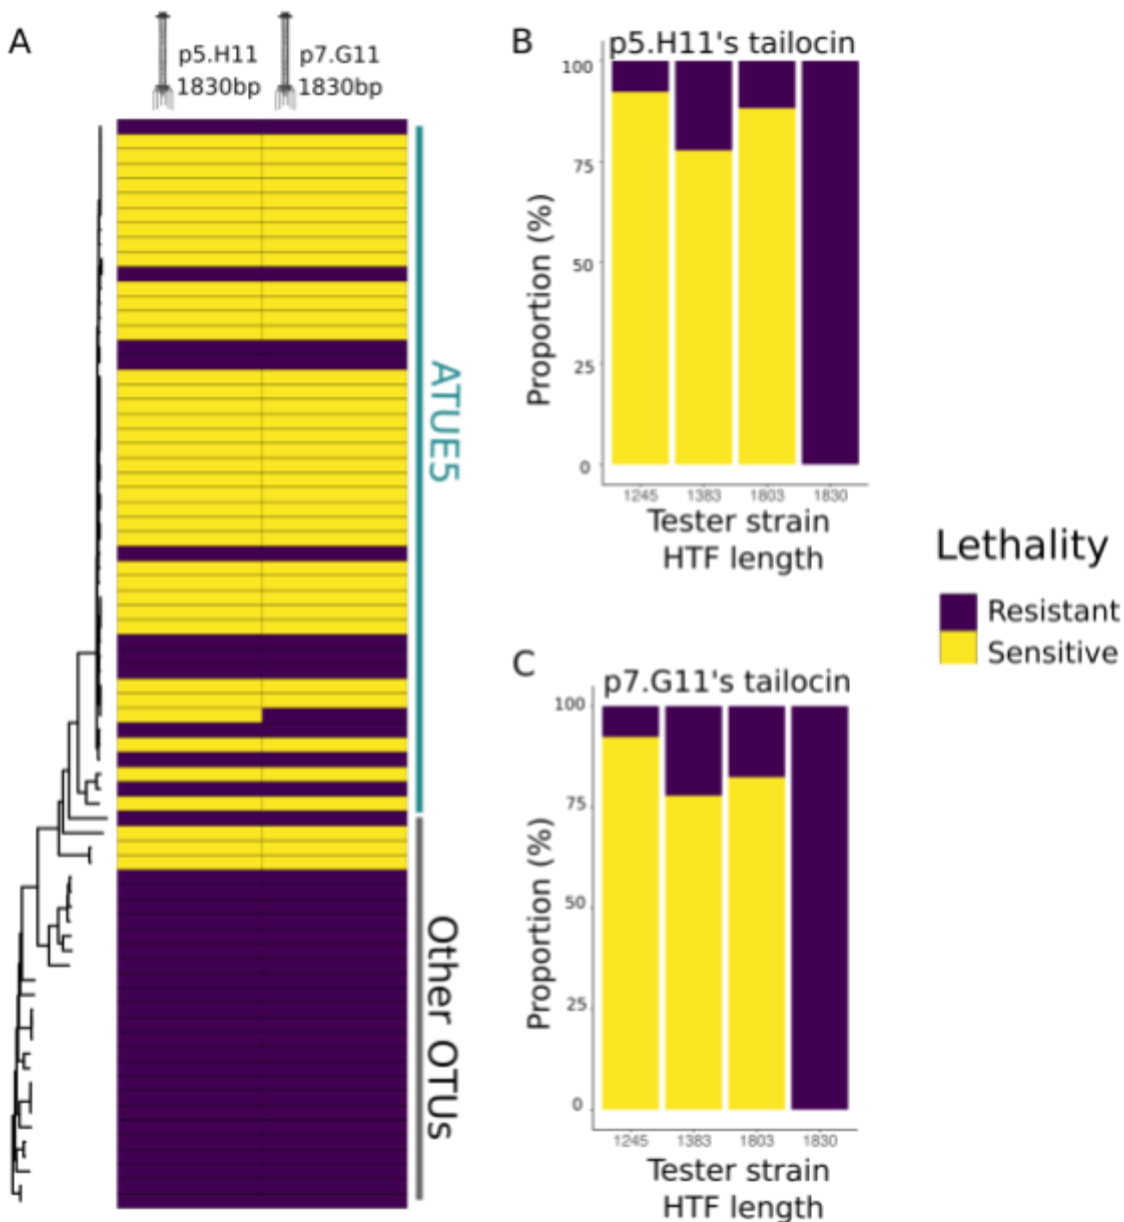

**Figure S6.** A. Tailocins are preferentially used for intra-lineage killing. Soft agar cultures of the *Pseudomonas* strains (rows) were challenged with viral particles extracted from cultures of two strains, p5.H11 and p7.G11 (from the 1830bp hypothetical tail fiber length haplotype, columns), in 3 technical replicates and 1 biological replicate. The phylogeny includes 83 *Pseudomonas* representative strains and are displayed according to their phylogenetic placement. Vertical lines indicate strains that belong to ATUE5 (colored in green) and other OTUs (colored in black). B-C. The proportion of tester strains sensitive or resistant to p5.H11's tailocin (B) and p7.G11's tailocin (C). Lethality significantly correlated with the tester strain's hypothetical tail fiber length haplotype (Fisher's Exact test,  $p = 10^{-4}$  (B),  $p = 10^{-3}$  (C)).

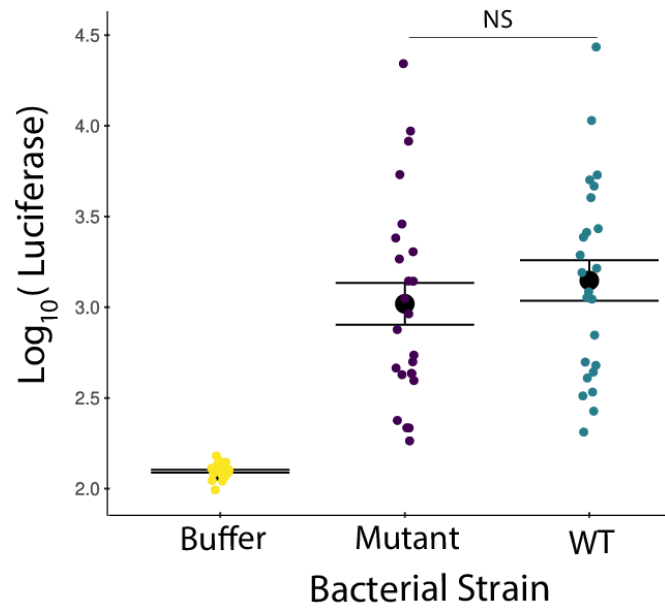

**Figure S7.** Growth of mutant and wild type p25.A12 *in planta*. Plants were infected in 24 technical replicates of a buffer control, mutant p25.A12, or wild type p25.A12 and luciferase was measured. ANOVA test, p-value 0.9.



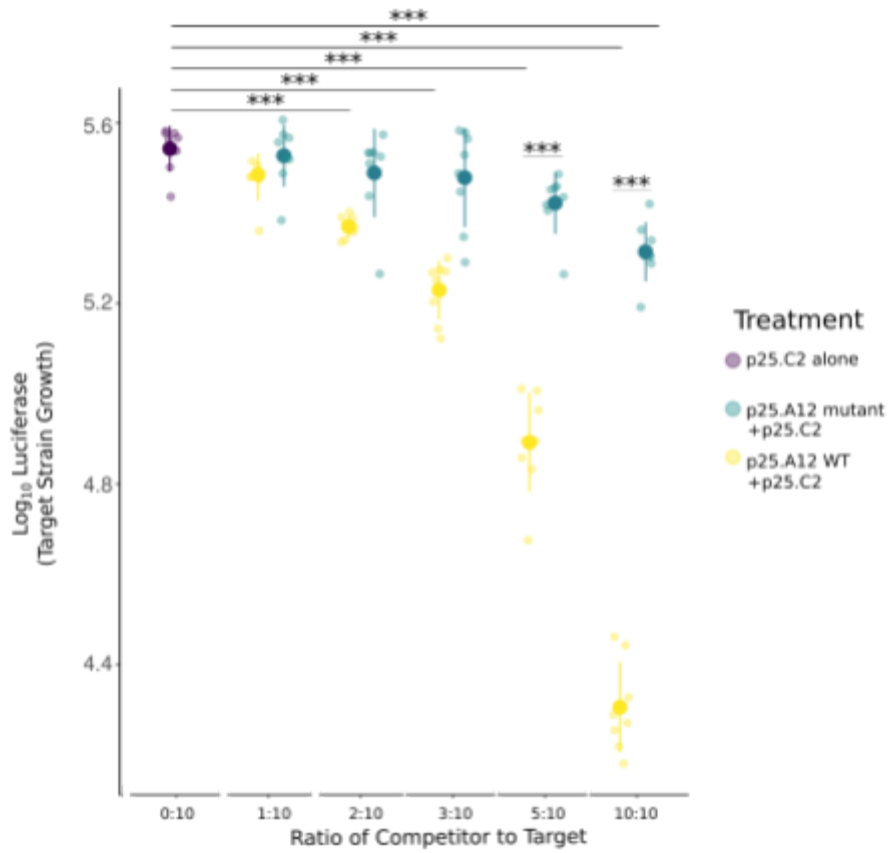

**Figure S8.** *In vitro* coinfections of p25.A12 (competitor) and p25.C2 (target, known to be sensitive to p25.A12). p25.A12 mutant competed with p25.C2 as well as p25.C2 grown alone were used as controls. Different ratios of competitor and constant amounts of target strain were used. p25.C2 grown alone as the control. The three highest values for each treatment was used and the average luciferase value was calculated for each condition. ANOVA test, P-values are shown as  $p < 0.001$  \*\*\*,  $p < 0.01$  \*\*, or  $p < 0.05$  \*.

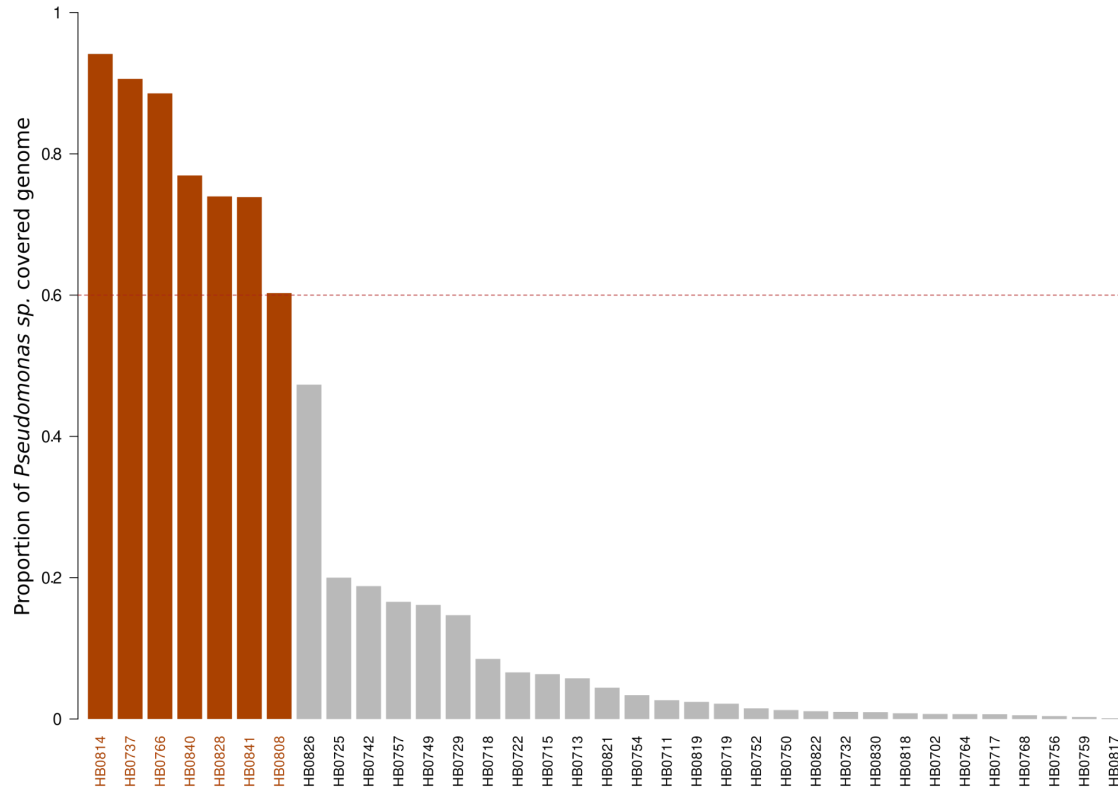

**Figure S9. Seven historical samples cover at least 60% of the *Pseudomonas* genome.** The height of the bars represents the proportion of the *Pseudomonas* sp. reference genome covered with at least one read after Mapping Quality filter value of 30. The horizontal dotted line depicts a threshold of 0.6.

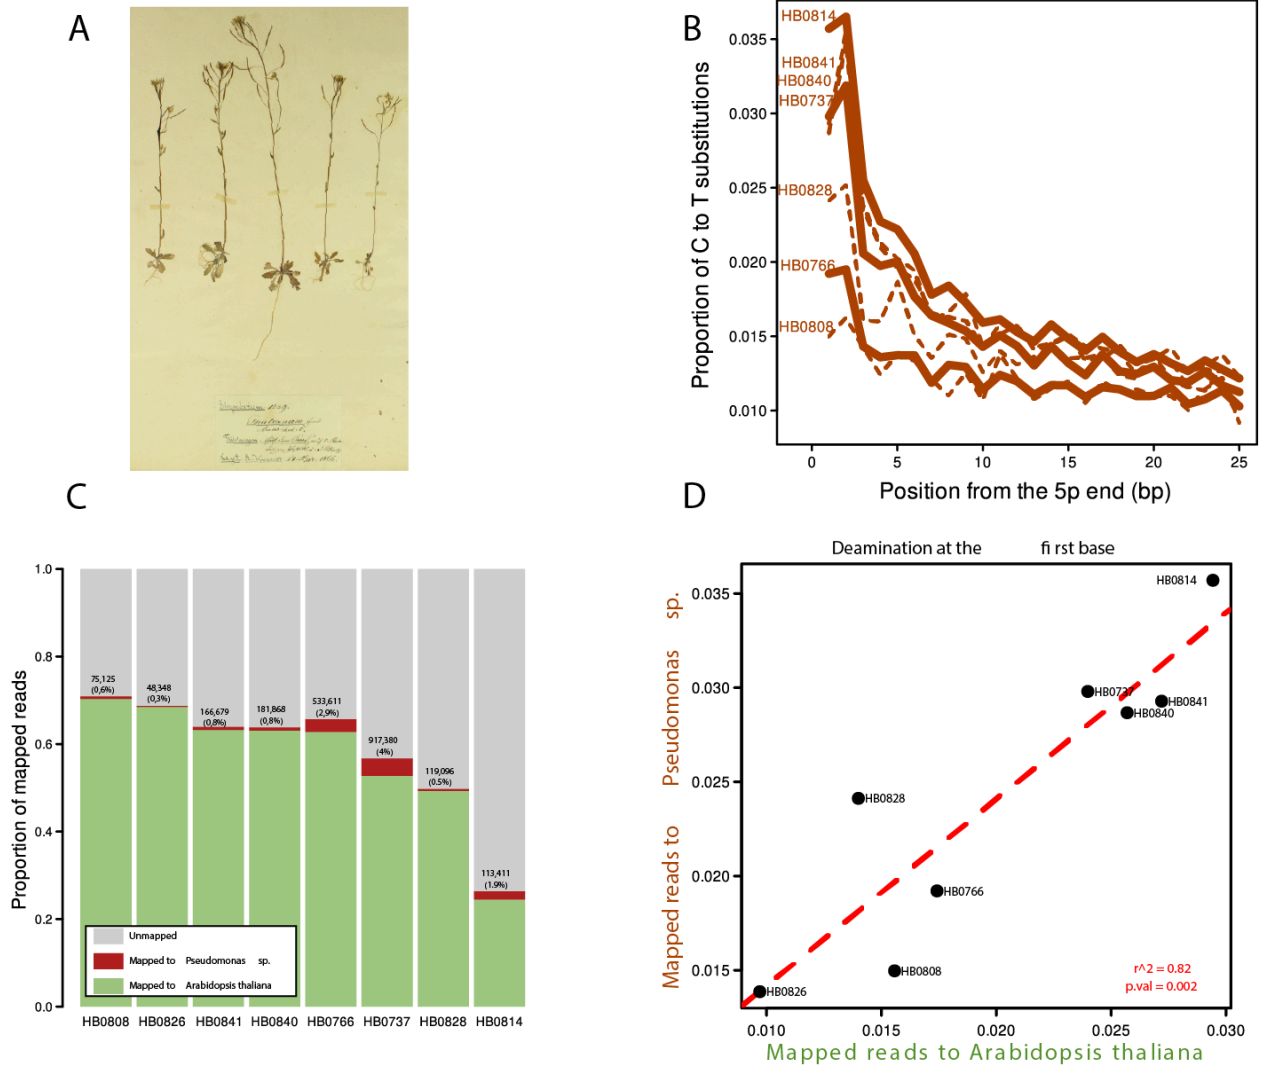

**Figure S10. Herbarium-derived reads assigned to the host plant *Arabidopsis thaliana* and to *Pseudomonas* sp. show degradation patterns typical of ancient DNA. A.** The photo shows a representative *A. thaliana* herbarium specimen (sample HB0729) sampled in the Tübingen herbarium and is part of the collection dataset previously reported in (67). **B.** Cytosine-to-Thymine (C-to-T) substitutions at the 5' end of reads mapped to the *Pseudomonas viridiflava* reference genome. Only samples that covered more than 60% of the *P. viridiflava* genome were included in the analysis. The thick lines indicate samples included in the phylogenetic analyses. **C.** The bars indicate the proportion of reads assigned to *A. thaliana* or to *Pseudomonas* sp. **D.** The scatter plot displays the relationship between the proportion of C-to-T substitutions at the first base of the 5' end between reads assigned to *A. thaliana* or to *Pseudomonas* sp. The red dotted line represents a linear model.

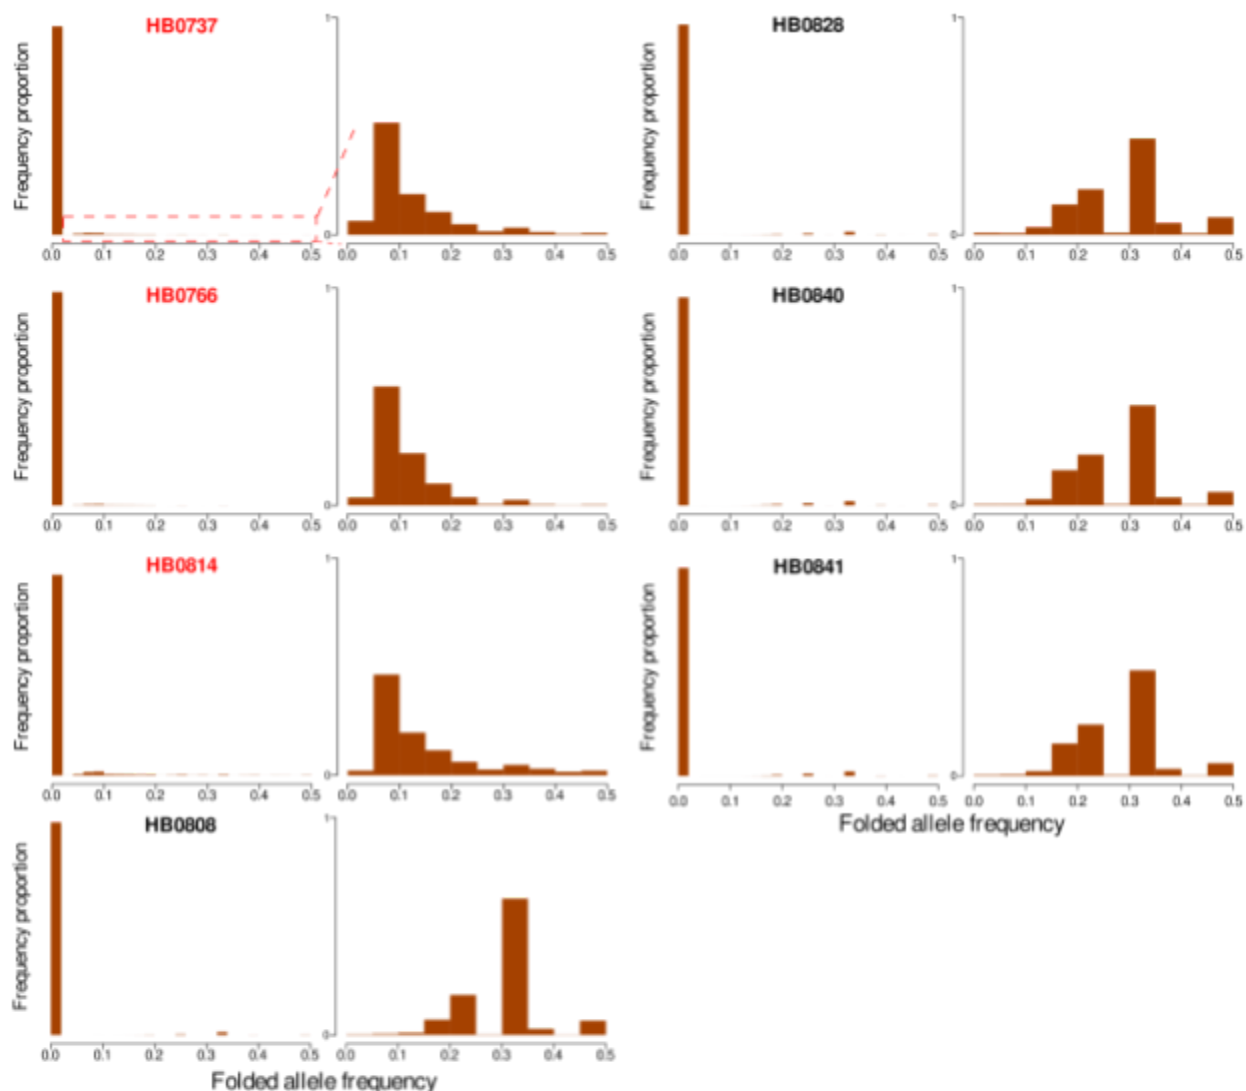

**Figure S11. Historical *Arabidopsis thaliana* herbarium specimens are dominated by a single *Pseudomonas* sp. strain.** The plots show the folded homozygosity support for each position along the *Pseudomonas viridiflava* genome with a coverage greater than 1x. A value of zero indicates that all reads support the same nucleotide (total homozygosity), where a value of 0.5 indicates maximum heterozygosity with only half of the reads supporting a particular nucleotide. Each row shows the folded homozygosity support for each sample. The left column shows all bins, whereas the bar indicating total homozygosity was removed in the right column.

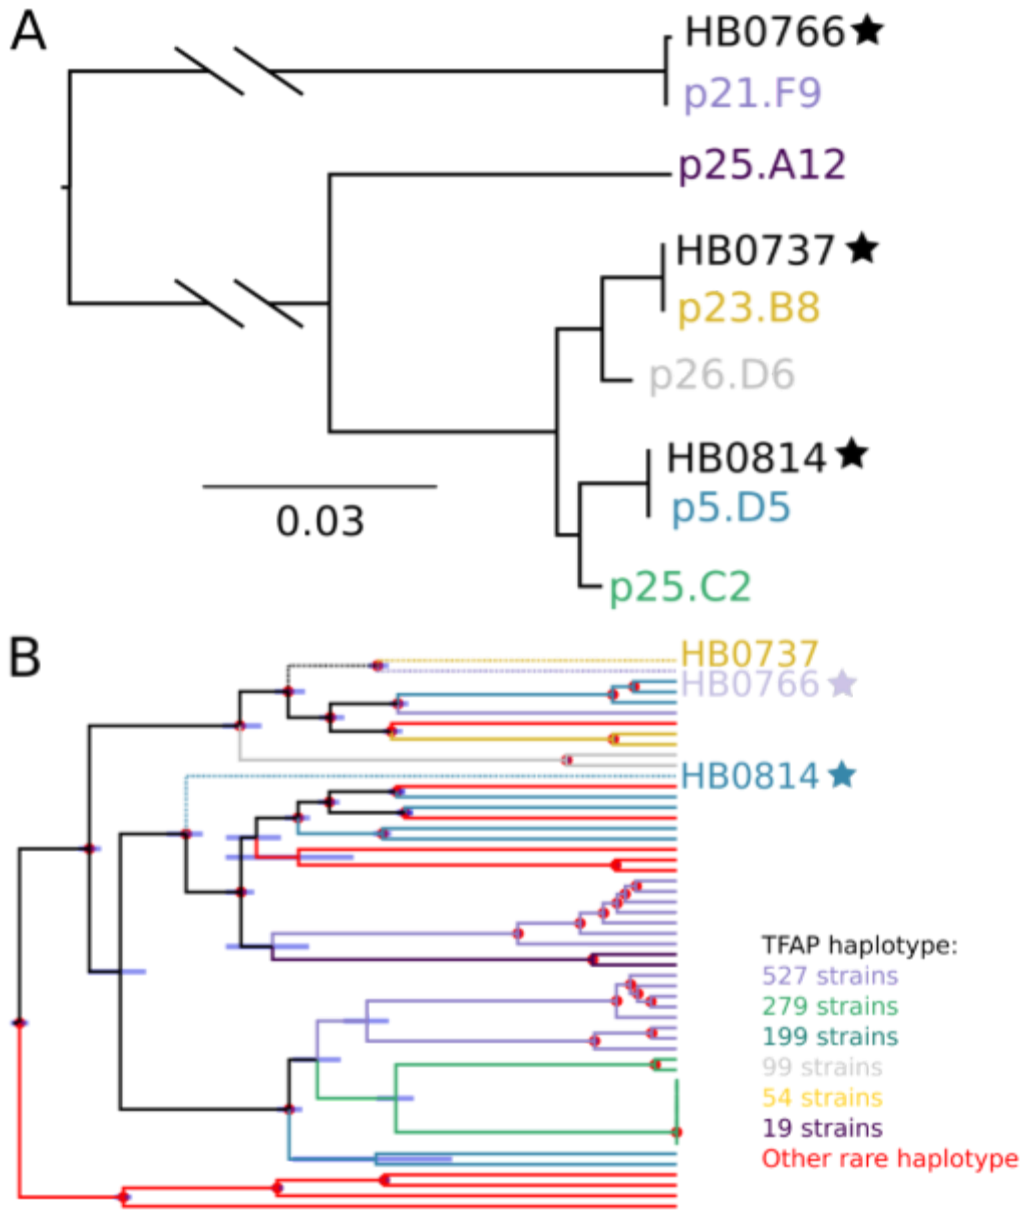

**Figure S12. A.** Neighbor-Joining tree of the tail fiber assembly gene translated sequence. Historical samples (HB) are placed in the context of the most common haplotypes. **B.** Bayesian tip-date calibrated phylogeny representing the evolutionary relationship between historical and modern *Pseudomonas* sp. strains. The tips and branches are colored based on the tail fiber assembly gene haplotype. Historical samples are shown with stars. The node bars represent the 95% Highest Posterior Density Intervals of the estimated time and the nodes marked with red dots represent those with posterior probability of 1.

**Table S1. Untargeted data dependent LC/MS/MS Proteomics data for p25.A12 WT and p25.A12 $\Delta$ TFA tailocin partially purified extracts.**

| Sample     | Accession                    | Description                                    | MW [kDa]               | # AAs  | Coverage [%]          | # Peptides        | # Unique Peptides    | # PSMs |                   |       |
|------------|------------------------------|------------------------------------------------|------------------------|--------|-----------------------|-------------------|----------------------|--------|-------------------|-------|
| p25.A12 WT | JNHLCIDM_0<br>0762           | Phage tail<br>sheath protein                   | 53.2                   | 498    | 77                    | 27                | 27                   | 109    |                   |       |
|            | Master Protein<br>Accessions | Sequence                                       | Modifications          | # PSMs | # Missed<br>Cleavages | Theo. MH+<br>[Da] | Observed m/z<br>[Da] | Charge | $\lambda$ M [ppm] | XCorr |
|            | JNHLCIDM_0<br>0762           | MAISFNNIPS<br>DVRVPLFYA<br>EMDNSAANS<br>ASAGMR | 1xMet-loss<br>[N-Term] | 1      | 1                     | 3515.66821        | 1172.56287           | 3      | 1.66              | 4.67  |
|            | JNHLCIDM_0<br>0762           | RLIVAQVND<br>DVTGPEIGSL<br>VLVPSVALA<br>K      |                        | 2      | 1                     | 2973.6983         | 991.90564            | 3      | 1.37              | 4.62  |
|            | JNHLCIDM_0<br>0762           | NDQHITIQAV<br>EMAAPQPV<br>WLQAAALA<br>AR       |                        | 3      | 0                     | 3013.56763        | 1005.19531           | 3      | 1.24              | 4.39  |
|            | JNHLCIDM_0<br>0762           | NAYGQADNS<br>YLDSETMHQ<br>SAFIIR               |                        | 12     | 0                     | 2731.24167        | 911.08704            | 3      | 1.79              | 3.99  |
|            | JNHLCIDM_0<br>0762           | ADPTGEVWC<br>LPLLNTEGA<br>K                    | 1xCarbamidomethyl [C9] | 7      | 0                     | 2071.01647        | 1036.01257           | 2      | 0.68              | 3.74  |
|            | JNHLCIDM_0<br>0762           | VQATVVNGA<br>TAAQAANAL<br>SVK                  |                        | 5      | 0                     | 1984.08218        | 992.54694            | 2      | 2.23              | 3.45  |
|            | JNHLCIDM_0<br>0762           | YGIATAYYEG<br>GYVR                             |                        | 7      | 0                     | 1582.75363        | 791.88129            | 2      | 1.05              | 3.38  |
|            | JNHLCIDM_0<br>0762           | LIVAQVND<br>VTGPEIGSLV<br>LVPSVALAK            |                        | 3      | 0                     | 2817.59719        | 939.87231            | 3      | 1.85              | 3.12  |
|            | JNHLCIDM_0<br>0762           | NLGGQGSM<br>AAMYETWR                           |                        | 3      | 0                     | 1884.87311        | 942.94202            | 2      | 1.93              | 3.04  |

|                    |                                          |                             |    |   |            |            |   |       |      |
|--------------------|------------------------------------------|-----------------------------|----|---|------------|------------|---|-------|------|
| JNHLCIDM_0<br>0762 | SVVDAGVLT<br>LSCK                        | 1xCarbamidom<br>ethyl [C12] | 4  | 0 | 1348.71408 | 674.86176  | 2 | 1.6   | 3.04 |
| JNHLCIDM_0<br>0762 | LEEEGHVEN<br>AEVFAQHLIV<br>ER            |                             | 5  | 0 | 2448.21538 | 816.74542  | 3 | 2.59  | 2.91 |
| JNHLCIDM_0<br>0762 | TAVFISADAS<br>RPTQSGTMP<br>GLDPAPASQR    |                             | 6  | 0 | 2929.44724 | 977.15558  | 3 | 1.69  | 2.81 |
| JNHLCIDM_0<br>0762 | FGAGQPIITP<br>STIR                       |                             | 4  | 0 | 1457.81109 | 729.40985  | 2 | 0.92  | 2.73 |
| JNHLCIDM_0<br>0762 | RGTVGTIVA<br>AGQLR                       |                             | 9  | 1 | 1398.81757 | 699.91278  | 2 | 0.51  | 2.46 |
| JNHLCIDM_0<br>0762 | FTLTERESLL<br>R                          |                             | 2  | 1 | 1364.75324 | 682.88141  | 2 | 1.69  | 2.33 |
| JNHLCIDM_0<br>0762 | GELIAQYAR                                |                             | 1  | 0 | 1020.54727 | 510.77844  | 2 | 2.29  | 2.27 |
| JNHLCIDM_0<br>0762 | INATPDLVPR                               |                             | 2  | 0 | 1095.61568 | 548.31262  | 2 | 2.08  | 2.06 |
| JNHLCIDM_0<br>0762 | GTVGTLVAA<br>GQLR                        |                             | 2  | 0 | 1242.71646 | 621.86285  | 2 | 1.59  | 1.98 |
| JNHLCIDM_0<br>0762 | RLQGVITSK                                |                             | 2  | 1 | 1001.6102  | 501.30865  | 2 | -0.17 | 1.82 |
| JNHLCIDM_0<br>0762 | VFALLNQFR                                |                             | 10 | 0 | 1107.63094 | 554.31921  | 2 | 0.19  | 1.8  |
| JNHLCIDM_0<br>0762 | MAISFNNIPS<br>DVR                        | 1xMet-loss<br>[N-Term]      | 3  | 0 | 1332.69064 | 666.84991  | 2 | 1.44  | 1.79 |
| JNHLCIDM_0<br>0762 | FGAGQPIITP<br>STIRGELIAQ<br>YAR          |                             | 3  | 1 | 2459.34052 | 820.45215  | 3 | 0.56  | 1.34 |
| JNHLCIDM_0<br>0762 | VPLFYAEMD<br>NSAANSASA<br>GMR            |                             | 2  | 0 | 2201.99541 | 734.67078  | 3 | 1.07  | 1.27 |
| JNHLCIDM_0<br>0762 | NDQHITIQAV<br>EMAAPQPV<br>WLQAAALA<br>AR | 1xOxidation<br>[M12]        | 1  | 0 | 3029.56255 | 1010.52716 | 3 | 1.45  | 1.24 |
| JNHLCIDM_0<br>0762 | QLYGHVYSA<br>K                           |                             | 3  | 0 | 1165.60003 | 583.30603  | 2 | 4.08  | 1.23 |
| JNHLCIDM_0<br>0762 | VNVMFPPDY<br>INGLR                       |                             | 4  | 0 | 1634.83592 | 817.92236  | 2 | 0.93  | 1.14 |

|            |                              |                                               |                      |        |                       |                   |                      |        |          |       |
|------------|------------------------------|-----------------------------------------------|----------------------|--------|-----------------------|-------------------|----------------------|--------|----------|-------|
|            | JNHLCIDM_0<br>0762           | AGATVTVAG<br>AATETGLLN<br>LYVGGVR             |                      | 2      | 0                     | 2361.27725        | 787.76465            | 3      | 0.91     | 1.11  |
|            | JNHLCIDM_0<br>0762           | DGNDPSRVN<br>VMFPPDYIN<br>GLR                 |                      | 1      | 1                     | 2376.1401         | 792.72034            | 3      | 2.67     | 0.86  |
|            | Accession                    | Description                                   | MW [kDa]             | # AAs  | Coverage [%]          | # Peptides        | # Unique Peptides    | # PSMs |          |       |
| p25.A12 WT | JNHLCIDM_0<br>0761           | Phage tail tube<br>protein                    | 12.5                 | 115    | 68                    | 7                 | 7                    | 24     |          |       |
|            | Master Protein<br>Accessions | Sequence                                      | Modifications        | # PSMs | # Missed<br>Cleavages | Theo. MH+<br>[Da] | Observed m/z<br>[Da] | Charge | λM [ppm] | XCorr |
|            | JNHLCIDM_0<br>0761           |                                               |                      | 6      | 0                     | 1987.01647        | 994.01355            | 2      | 1.69     | 4.37  |
|            | JNHLCIDM_0<br>0761           | TYVLSGAYL<br>VEEPTSK                          |                      | 5      | 0                     | 1756.90036        | 878.95569            | 2      | 2.13     | 3.02  |
|            | JNHLCIDM_0<br>0761           |                                               |                      | 1      | 1                     | 1967.87297        | 984.44226            | 2      | 2.17     | 2.89  |
|            | JNHLCIDM_0<br>0761           | AVHTPDMP<br>K                                 |                      | 2      | 0                     | 1108.58194        | 554.79468            | 2      | 0.12     | 2.53  |
|            | JNHLCIDM_0<br>0761           | VDGTQLTISG<br>GGEAPLMNV<br>K                  | 1xOxidation<br>[M17] | 1      | 0                     | 2003.01138        | 668.34283            | 3      | 1.28     | 2.33  |
|            | JNHLCIDM_0<br>0761           | ADDGTIDLR                                     |                      | 2      | 0                     | 975.47416         | 488.24094            | 2      | 0.44     | 2.27  |
|            | JNHLCIDM_0<br>0761           | RDTVVPGYF<br>KEVDK                            |                      | 1      | 2                     | 1652.86425        | 551.62689            | 3      | 1.14     | 1.7   |
|            | JNHLCIDM_0<br>0761           | RDTVVPGYF<br>K                                |                      | 1      | 1                     | 1181.63133        | 394.54852            | 3      | -0.27    | 1.48  |
|            | JNHLCIDM_0<br>0761           | AVHTPDMP<br>K                                 | 1xOxidation<br>[M7]  | 5      | 0                     | 1124.57686        | 375.53104            | 3      | 1.51     | 1.4   |
|            | Accession                    | Description                                   | MW [kDa]             | # AAs  | Coverage [%]          | # Peptides        | # Unique Peptides    | # PSMs |          |       |
| p25.A12 WT | JNHLCIDM_0<br>0046           | hypothetical<br>protein<br>JNHLCIDM_0<br>0046 | 48.5                 | 460    | 52                    | 17                | 17                   | 28     |          |       |
|            | Master Protein<br>Accessions | Sequence                                      | Modifications        | # PSMs | # Missed<br>Cleavages | Theo. MH+<br>[Da] | Observed m/z<br>[Da] | Charge | λM [ppm] | XCorr |



|            |                           |                        |               |        |                    |                |                   |        |                   |       |
|------------|---------------------------|------------------------|---------------|--------|--------------------|----------------|-------------------|--------|-------------------|-------|
|            | JNHLCIDM_0<br>0046        | AAVDSTDLG<br>NLWYSR    |               | 2      | 0                  | 1667.80237     | 834.4057          | 2      | 1.05              | 2.76  |
|            | JNHLCIDM_0<br>0046        | IAALGLSEVG<br>SYAFAR   |               | 5      | 0                  | 1624.86933     | 812.93933         | 2      | 1.26              | 2.68  |
|            | JNHLCIDM_0<br>0046        |                        |               | 1      | 0                  | 2318.09487     | 773.37079         | 3      | 1.27              | 2.58  |
|            | JNHLCIDM_0<br>0046        |                        |               | 1      | 0                  | 1893.93009     | 947.46997         | 2      | 1.36              | 2.45  |
|            | JNHLCIDM_0<br>0046        |                        |               | 1      | 1                  | 2050.03121     | 684.01672         | 3      | 2.15              | 2.26  |
|            | JNHLCIDM_0<br>0046        | SVPGVGLVS<br>GK        |               | 1      | 0                  | 999.58332      | 500.29584         | 2      | 1.08              | 2.21  |
|            | JNHLCIDM_0<br>0046        |                        |               | 3      | 0                  | 1953.05524     | 977.0329          | 2      | 1.68              | 2.18  |
|            | JNHLCIDM_0<br>0046        |                        |               | 2      | 0                  | 2632.37294     | 878.13116         | 3      | 2.28              | 2.12  |
|            | JNHLCIDM_0<br>0046        | ANRGTTLEA<br>YGITNAYTK |               | 1      | 1                  | 1943.98213     | 648.66626         | 3      | 1.08              | 1.79  |
|            | JNHLCIDM_0<br>0046        | AILGLAASD<br>YKK       |               | 2      | 1                  | 1249.71506     | 625.36182         | 2      | 1.03              | 1.78  |
|            | JNHLCIDM_0<br>0046        | NFNPDCKAN<br>R         |               | 1      | 1                  | 1190.55487     | 397.52283         | 3      | -0.8              | 1.77  |
|            | JNHLCIDM_0<br>0046        |                        |               | 3      | 0                  | 2505.17799     | 1253.09766        | 2      | 4.01              | 1.26  |
|            | JNHLCIDM_0<br>0046        |                        |               | 1      | 0                  | 2116.95388     | 706.32239         | 3      | -0.6              | 1.25  |
|            | JNHLCIDM_0<br>0046        | GTITLEAYGIT<br>NAYTK   |               | 1      | 0                  | 1602.80098     | 801.90369         | 2      | -0.55             | 1.25  |
|            | JNHLCIDM_0<br>0046        | ESDNGVYYL<br>QSR       |               | 1      | 0                  | 1430.65465     | 715.83258         | 2      | 2.26              | 1.22  |
|            | JNHLCIDM_0<br>0046        | SGVAAGNYS<br>R         |               | 1      | 0                  | 981.47483      | 491.24109         | 2      | 0.07              | 1.17  |
|            | JNHLCIDM_0<br>0046        | IGWSGSSLK              |               | 1      | 0                  | 934.49926      | 467.75381         | 2      | 1.17              | 1.04  |
|            | Accession                 | Description            | MW [kDa]      | # AAs  | Coverage [%]       | # Peptides     | # Unique Peptides | # PSMs |                   |       |
| p25.A12 WT | estA                      | estA                   | 69.5          | 643    | 26                 | 10             | 10                | 19     |                   |       |
|            | Master Protein Accessions | Sequence               | Modifications | # PSMs | # Missed Cleavages | Theo. MH+ [Da] | Observed m/z [Da] | Charge | $\lambda$ M [ppm] | XCorr |

|            |                              |                                               |               |        |                       |                   |                      |        |          |       |
|------------|------------------------------|-----------------------------------------------|---------------|--------|-----------------------|-------------------|----------------------|--------|----------|-------|
|            | estA                         |                                               |               | 4      | 0                     | 2142.02506        | 1071.51807           | 2      | 1.77     | 3.45  |
|            | estA                         |                                               |               | 4      | 1                     | 2774.37037        | 925.46375            | 3      | 2.27     | 3.23  |
|            | estA                         | LADSAQVLQ<br>QAGAR                            |               | 1      | 0                     | 1427.76012        | 714.38489            | 2      | 1.67     | 2.75  |
|            | estA                         |                                               |               | 2      | 0                     | 2427.17866        | 1214.09607           | 2      | 2.56     | 2.17  |
|            | estA                         | FNEQLVSR                                      |               | 1      | 0                     | 992.51597         | 496.76288            | 2      | 2.53     | 1.97  |
|            | estA                         |                                               |               | 3      | 0                     | 2833.44254        | 945.15436            | 3      | 2.11     | 1.93  |
|            | estA                         |                                               |               | 1      | 0                     | 3368.6692         | 1123.56396           | 3      | 2.42     | 1.93  |
|            | estA                         | STALTFSDQT<br>R                               |               | 1      | 0                     | 1226.60116        | 613.80511            | 2      | 1.46     | 1.36  |
|            | estA                         | LFNDNR                                        |               | 1      | 0                     | 811.40971         | 406.20889            | 2      | 0.98     | 1.03  |
|            | estA                         | GYNLITIGTSY<br>R                              |               | 1      | 0                     | 1244.62698        | 622.81763            | 2      | 0.8      | 0.88  |
|            | Accession                    | Description                                   | MW [kDa]      | # AAs  | Coverage [%]          | # Peptides        | # Unique Peptides    | # PSMs |          |       |
| p25.A12 WT | JNHLCIDM_0<br>0765           | hypothetical<br>protein<br>JNHLCIDM_0<br>0765 | 12.2          | 112    | 15                    | 1                 | 1                    | 1      |          |       |
|            | Master Protein<br>Accessions | Sequence                                      | Modifications | # PSMs | # Missed<br>Cleavages | Theo. MH+<br>[Da] | Observed m/z<br>[Da] | Charge | λM [ppm] | XCORR |
|            | JNHLCIDM_0<br>0765           | VESAATVASE<br>AAHTASR                         |               | 1      | 0                     | 1657.814          | 553.27771            | 3      | 2.76     | 1.17  |
|            | Accession                    | Description                                   | MW [kDa]      | # AAs  | Coverage [%]          | # Peptides        | # Unique Peptides    | # PSMs |          |       |
| p25.A12 WT | JNHLCIDM_0<br>0764           | hypothetical<br>protein<br>JNHLCIDM_0<br>0764 | 21.3          | 196    | 7                     | 1                 | 1                    | 1      |          |       |
|            | Master Protein<br>Accessions | Sequence                                      | Modifications | # PSMs | # Missed<br>Cleavages | Theo. MH+<br>[Da] | Observed m/z<br>[Da] | Charge | λM [ppm] | XCORR |
|            | JNHLCIDM_0<br>0764           | RGQEASEQL<br>HAIR                             |               | 1      | 1                     | 1494.77716        | 498.93112            | 3      | 1.1      | 1.13  |
|            | Accession                    | Description                                   | MW [kDa]      | # AAs  | Coverage [%]          | # Peptides        | # Unique Peptides    | # PSMs |          |       |
| p25.A12 WT | JNHLCIDM_0<br>0048           | Chitinase class<br>I                          | 20            | 181    | 5                     | 1                 | 1                    | 1      |          |       |

|            | Master Protein<br>Accessions | Sequence                                      | Modifications | # PSMs | # Missed<br>Cleavages | Theo. MH+<br>[Da] | Observed m/z<br>[Da] | Charge | λM [ppm] | XCorr |
|------------|------------------------------|-----------------------------------------------|---------------|--------|-----------------------|-------------------|----------------------|--------|----------|-------|
|            | JNHLCIDM_0<br>0048           | YDTGQLALR                                     |               | 1      | 0                     | 1036.54218        | 518.77545            | 2      | 1.39     | 1.97  |
|            | Accession                    | Description                                   | MW [kDa]      | # AAs  | Coverage [%]          | # Peptides        | # Unique<br>Peptides | # PSMs |          |       |
| p25.A12 WT | JNHLCIDM_0<br>0049           | Bacteriophage<br>lysis protein                | 18.3          | 169    | 4                     | 1                 | 1                    | 1      |          |       |
|            | Master Protein<br>Accessions | Sequence                                      | Modifications | # PSMs | # Missed<br>Cleavages | Theo. MH+<br>[Da] | Observed m/z<br>[Da] | Charge | λM [ppm] | XCorr |
|            | JNHLCIDM_0<br>0049           | LATADLR                                       |               | 1      | 0                     | 759.43593         | 380.22162            | 2      | 0.04     | 1.1   |
|            | Accession                    | Description                                   | MW [kDa]      | # AAs  | Coverage [%]          | # Peptides        | # Unique<br>Peptides | # PSMs |          |       |
| p25.A12 WT | JNHLCIDM_0<br>0039           | hypothetical<br>protein<br>JNHLCIDM_0<br>0039 | 22.3          | 208    | 4                     | 1                 | 1                    | 1      |          |       |
|            | Master Protein<br>Accessions | Sequence                                      | Modifications | # PSMs | # Missed<br>Cleavages | Theo. MH+<br>[Da] | Observed m/z<br>[Da] | Charge | λM [ppm] | XCorr |
|            | JNHLCIDM_0<br>0039           | LNEFAEER                                      |               | 1      | 0                     | 1007.47925        | 504.24396            | 2      | 1.38     | 1.05  |
|            | Accession                    | Description                                   | MW [kDa]      | # AAs  | Coverage [%]          | # Peptides        | # Unique<br>Peptides | # PSMs |          |       |
| p25.A12 WT | JNHLCIDM_0<br>0044           | Baseplate J-like<br>protein                   | 36.9          | 346    | 3                     | 1                 | 1                    | 1      |          |       |
|            | Master Protein<br>Accessions | Sequence                                      | Modifications | # PSMs | # Missed<br>Cleavages | Theo. MH+<br>[Da] | Observed m/z<br>[Da] | Charge | λM [ppm] | XCorr |
|            | JNHLCIDM_0<br>0044           | TQVDLAGDA<br>LR                               |               | 1      | 0                     | 1158.61133        | 579.80981            | 2      | 0.88     | 1.49  |
|            | Accession                    | Description                                   | MW [kDa]      | # AAs  | Coverage [%]          | # Peptides        | # Unique<br>Peptides | # PSMs |          |       |
| p25.A12 WT | trpE                         | trpE                                          | 54.5          | 493    | 3                     | 1                 | 1                    | 1      |          |       |
|            | Master Protein<br>Accessions | Sequence                                      | Modifications | # PSMs | # Missed<br>Cleavages | Theo. MH+<br>[Da] | Observed m/z<br>[Da] | Charge | λM [ppm] | XCorr |
|            | trpE                         | AILPAGTSLG<br>APK                             |               | 1      | 0                     | 1195.7045         | 598.35718            | 2      | 2.16     | 1.4   |
|            | Accession                    | Description                                   | MW [kDa]      | # AAs  | Coverage [%]          | # Peptides        | # Unique<br>Peptides | # PSMs |          |       |

|             |                           |                                                    |                         |        |                    |                |                   |        |          |       |
|-------------|---------------------------|----------------------------------------------------|-------------------------|--------|--------------------|----------------|-------------------|--------|----------|-------|
| p25.A12 WT  | JNHLCIDM_0<br>0040        | Mu-like prophage FluMu DNA circularization protein | 51.9                    | 499    | 2                  | 1              | 1                 | 1      |          |       |
|             | Master Protein Accessions | Sequence                                           | Modifications           | # PSMs | # Missed Cleavages | Theo. MH+ [Da] | Observed m/z [Da] | Charge | λM [ppm] | XCorr |
|             | JNHLCIDM_0<br>0040        | AVMATVDAV<br>R                                     |                         | 1      | 0                  | 1032.55064     | 516.77795         | 2      | -1.95    | 0.64  |
|             | Accession                 | Description                                        | MW [kDa]                | # AAs  | Coverage [%]       | # Peptides     | # Unique Peptides | # PSMs |          |       |
| p25.A12ΔTFA | JNHLCIDM_0<br>0762        | Phage tail sheath protein                          | 53.2                    | 498    | 56                 | 22             | 22                | 81     |          |       |
|             | Master Protein Accessions | Sequence                                           | Modifications           | # PSMs | # Missed Cleavages | Theo. MH+ [Da] | Observed m/z [Da] | Charge | λM [ppm] | XCorr |
|             | JNHLCIDM_0<br>0762        | ADPTGEVWC<br>LPLLNTEGA<br>K                        | 1xCarbamidomethyl [C9]  | 2      | 0                  | 2071.01647     | 1036.01428        | 2      | 2.33     | 4.17  |
|             | JNHLCIDM_0<br>0762        | SVVDAGVLT<br>LSCK                                  | 1xCarbamidomethyl [C12] | 5      | 0                  | 1348.71408     | 674.86176         | 2      | 1.6      | 2.57  |
|             | JNHLCIDM_0<br>0762        | FGAGQPIITP<br>STIR                                 |                         | 5      | 0                  | 1457.81109     | 729.41052         | 2      | 1.84     | 2.4   |

**Table S2: Relative mole percentage of monosaccharide residues detected by GC/MS.**

| Residue/Strain | Mole %      |             |            |             |
|----------------|-------------|-------------|------------|-------------|
|                | p21.F1      | p21.F9      | p25.A12    | p25.C2      |
| <b>Rha</b>     | <b>63.4</b> | <b>11.1</b> | <b>9.6</b> | <b>72.3</b> |
| <b>Man</b>     | <b>0.1</b>  | <b>0.2</b>  | <b>0.1</b> | <b>0.1</b>  |

|               |              |              |             |             |
|---------------|--------------|--------------|-------------|-------------|
| <b>Gal</b>    | <b>0.0</b>   | <b>0.0</b>   | <b>0.1</b>  | <b>0.0</b>  |
| <b>Glc</b>    | <b>21.7</b>  | <b>56.5</b>  | <b>75.4</b> | <b>14.5</b> |
| <b>Hep</b>    | <b>0.2</b>   | <b>Tr.</b>   | <b>0.0</b>  | <b>0.0</b>  |
| <b>Kdo</b>    | <b>3.0</b>   | <b>11.4</b>  | <b>1.2</b>  | <b>0.3</b>  |
| <b>FucNAc</b> | <b>5.8</b>   | <b>0.0</b>   | <b>0.0</b>  | <b>5.1</b>  |
| <b>QuiNAc</b> | <b>1.1</b>   | <b>0.0</b>   | <b>0.6</b>  | <b>0.8</b>  |
| <b>ManNAc</b> | <b>0.3</b>   | <b>1.9</b>   | <b>0.9</b>  | <b>0.6</b>  |
| <b>GalNAc</b> | <b>0.3</b>   | <b>1.1</b>   | <b>0.7</b>  | <b>0.3</b>  |
| <b>GlcNAc</b> | <b>4.2</b>   | <b>17.6</b>  | <b>11.6</b> | <b>6.0</b>  |
| <hr/>         |              |              |             |             |
| <b>% CHO</b>  | <b>60.6%</b> | <b>22.5%</b> | <b>31%</b>  | <b>52%</b>  |
| <hr/>         |              |              |             |             |

Tr.- trace

**Table S3: Historic and modern sample metadata.**

\* Type: (H)istoric ; (M)odern

| ACCESSION_ID | ENA_ID      | TYP | COLLECTIO<br>N_YEA<br>R | COUNTRY | LOCATION                    | LAT        | LON       | Pseudomonas<br>_Genome_Co<br>verage_Prop. | Pseudomonas<br>_Genome_Ave<br>rage_Depth_<br>MQ30 | Used_for_au<br>thentication_<br>analyses |    |
|--------------|-------------|-----|-------------------------|---------|-----------------------------|------------|-----------|-------------------------------------------|---------------------------------------------------|------------------------------------------|----|
| HB0702       | SRR21814520 | H   | 1905                    | DEU     | Mellendorf_ne<br>ar_Buttlar | 52.5470675 | 9.7299326 | 0.00701769                                | 0.00629547                                        | NO                                       | NO |
| HB0711       | SRR21814519 | H   | 1840                    | DEU     | NA                          | NA         | NA        | 0.0266046                                 | 0.0199101                                         | NO                                       | NO |
| HB0713       | SRR21814508 | H   | 1826                    | DEU     | Esslingen                   | 48.7427584 | 9.3071685 | 0.057587                                  | 0.0515586                                         | NO                                       | NO |
| HB0715       | SRR21814497 | H   | 1828                    | DEU     | Esslingen                   | 48.7427584 | 9.3071685 | 0.0634669                                 | 0.0581094                                         | NO                                       | NO |

|        |             |   |      |     |                                   |             |             |            |            |     |     |
|--------|-------------|---|------|-----|-----------------------------------|-------------|-------------|------------|------------|-----|-----|
| HB0717 | SRR21814491 | H | 1826 | DEU | Alpirsbach                        | 48.3456021  | 8.4033079   | 0.00664118 | 0.00581024 | NO  | NO  |
| HB0718 | SRR21814490 | H | 1890 | DEU | Tuebingen                         | 48.5236164  | 9.0535531   | 0.0850372  | 0.0709387  | NO  | NO  |
| HB0719 | SRR21814489 | H | 1890 | DEU | Tuebingen                         | 48.5236164  | 9.0535531   | 0.0216538  | 0.0139758  | NO  | NO  |
| HB0722 | SRR21814488 | H | 1891 | DEU | Altburg                           | 48.6619431  | 8.6926366   | 0.0659517  | 0.0522472  | NO  | NO  |
| HB0725 | SRR21814487 | H | 1888 | DEU | Tuebingen                         | 48.5236164  | 9.0535531   | 0.199974   | 0.197268   | NO  | NO  |
| HB0729 | SRR21814486 | H | 1866 | DEU | Tuebingen                         | 48.5236164  | 9.0535531   | 0.146878   | 0.136151   | NO  | NO  |
| HB0732 | SRR21814518 | H | 1932 | DEU | Rastatt                           | 49.0532906  | 8.5245089   | 0.0100316  | 0.0070049  | NO  | NO  |
| HB0737 | SRR21814517 | H | 1937 | DEU | Tuebingen                         | 48.5236164  | 9.0535531   | 0.906105   | 8.75871    | YES | YES |
| HB0742 | SRR21814516 | H | 1953 | DEU | Lichtenstein                      | 48.41996913 | 9.26630222  | 0.187988   | 0.162055   | NO  | NO  |
| HB0749 | SRR21814515 | H | 1849 | DEU | near_Hohenheim                    | 48.7118     | 9.2113      | 0.161478   | 0.156122   | NO  | NO  |
| HB0750 | SRR21814514 | H | 1957 | DEU | Boeblingen                        | 48.684969   | 9.0113444   | 0.012546   | 0.010024   | NO  | NO  |
| HB0752 | SRR21814513 | H | 1952 | DEU | Eberspiel_in_the_district_of_Calw | 48.7415506  | 8.6842699   | 0.0150715  | 0.0118002  | NO  | NO  |
| HB0754 | SRR21814512 | H | 1951 | DEU | District_of_Calw                  | 48.7153344  | 8.7381796   | 0.033677   | 0.028471   | NO  | NO  |
| HB0756 | SRR21814511 | H | 1951 | DEU | Wendlingen                        | 50.8021737  | 7.7130698   | 0.00412007 | 0.00351381 | NO  | NO  |
| HB0757 | SRR21814510 | H | 1951 | DEU | Wendlingen                        | 50.8021737  | 7.7130698   | 0.165843   | 0.100545   | NO  | NO  |
| HB0759 | SRR21814509 | H | 1893 | DEU | Wohlmuthausen                     | 50.5727241  | 10.21353915 | 0.00280539 | 0.00201518 | NO  | NO  |
| HB0764 | SRR21814507 | H | 1905 | DEU | Mengen                            | 48.049796   | 9.3316096   | 0.00683053 | 0.00540983 | NO  | NO  |
| HB0766 | SRR21814506 | H | 1846 | DEU | Monastery_for_est_Hohenzollern    | 47.9724751  | 10.3005044  | 0.885642   | 7.63767    | YES | YES |
| HB0768 | SRR21814505 | H | 1894 | DEU | Todtnau                           | 47.8303378  | 7.9452378   | 0.00528544 | 0.00427861 | NO  | NO  |
| HB0808 | SRR21814504 | H | 1817 | DEU | Stuttgart_Moehringen              | 48.7784485  | 9.1800132   | 0.60285    | 0.974844   | YES | NO  |
| HB0814 | SRR21814503 | H | 1882 | DEU | Heidelberg                        | 49.4093582  | 8.694724    | 0.941364   | 8.13508    | YES | YES |
| HB0817 | SRR21814502 | H | 1934 | DEU | Gundelwangen_near_Bonndorf        | 47.8426163  | 8.2864051   | 0.00113424 | 0.00213973 | NO  | NO  |
| HB0818 | SRR21814501 | H | 1928 | DEU | Langenau_near_Ulm                 | 48.7276553  | 8.0150864   | 0.00812181 | 0.00744537 | NO  | NO  |
| HB0819 | SRR21814500 | H | 1928 | DEU | Langenau_near_Ulm                 | 48.7276553  | 8.0150864   | 0.0241737  | 0.0120816  | NO  | NO  |
| HB0821 | SRR21814499 | H | 1874 | DEU | Winnenden                         | 48.8754571  | 9.3978478   | 0.0443252  | 0.0396616  | NO  | NO  |

|         |             |   |      |     |                                          |            |            |            |            |     |     |
|---------|-------------|---|------|-----|------------------------------------------|------------|------------|------------|------------|-----|-----|
| HB0822  | SRR21814498 | H | 1936 | DEU | Hohentwiel                               | 47.7617515 | 8.8348709  | 0.0109147  | 0.0104388  | NO  | NO  |
| HB0826  | SRR21814496 | H | 1948 | DEU | Abtsgmuend                               | 48.8936471 | 10.0027636 | 0.473287   | 0.665255   | NO  | NO  |
| HB0828  | SRR21814495 | H | 1890 | DEU | Schramberg                               | 48.225478  | 8.3852168  | 0.739741   | 1.6142     | YES | NO  |
| HB0830  | SRR21814494 | H | 1862 | DEU | near_Beimerst<br>etten                   | 48.4840643 | 9.9836241  | 0.00970948 | 0.00894266 | NO  | NO  |
| HB0840  | SRR21814493 | H | 1851 | DEU | Sulz_am_Nec<br>kar                       | 48.3617509 | 8.6314329  | 0.769394   | 1.61748    | YES | NO  |
| HB0841  | SRR21814492 | H | 1875 | DEU | Freudenstadt_i<br>n_the_Black_<br>Forest | 48.4637727 | 8.4111727  | 0.738722   | 1.44545    | YES | NO  |
| p12.A11 | NA          | M | 2018 | DEU | Eyach                                    | 48.446111  | 8.781611   | 0.955211   | 43.2805    | NA  | YES |
| p12.A9  | NA          | M | 2018 | DEU | Eyach                                    | 48.446111  | 8.781611   | 0.385298   | 2.68517    | NA  | NO  |
| p12.E2  | NA          | M | 2018 | DEU | Eyach                                    | 48.446111  | 8.781611   | 0.946364   | 124.361    | NA  | YES |
| p12.F2  | NA          | M | 2018 | DEU | Det-2                                    | 48.556255  | 9.135424   | 0.941151   | 61.1632    | NA  | YES |
| p12.G7  | NA          | M | 2018 | DEU | Det-2                                    | 48.556255  | 9.135424   | 0.942483   | 26.1727    | NA  | YES |
| p12.H7  | NA          | M | 2018 | DEU | Det-2                                    | 48.556255  | 9.135424   | 0.703408   | 7.44366    | NA  | NO  |
| p13.C1  | NA          | M | 2018 | DEU | Eyach                                    | 48.446111  | 8.781611   | 0.919667   | 91.4711    | NA  | YES |
| p13.C7  | NA          | M | 2018 | DEU | Eyach                                    | 48.446111  | 8.781611   | 0.915668   | 30.2041    | NA  | NO  |
| p13.D10 | NA          | M | 2018 | DEU | Eyach                                    | 48.446111  | 8.781611   | 0.917782   | 83.4618    | NA  | YES |
| p13.D5  | NA          | M | 2018 | DEU | Eyach                                    | 48.446111  | 8.781611   | 0.373545   | 3.2645     | NA  | NO  |
| p13.F1  | NA          | M | 2018 | DEU | Eyach                                    | 48.446111  | 8.781611   | 0.548638   | 9.89508    | NA  | NO  |
| p13.F3  | NA          | M | 2018 | DEU | Eyach                                    | 48.446111  | 8.781611   | 0.930129   | 180.182    | NA  | YES |
| p13.F5  | NA          | M | 2018 | DEU | Eyach                                    | 48.446111  | 8.781611   | 0.486993   | 7.68403    | NA  | NO  |
| p20.B10 | NA          | M | 2018 | DEU | Eyach                                    | 48.446111  | 8.781611   | 0.362051   | 6.0333     | NA  | NO  |
| p20.D4  | NA          | M | 2018 | DEU | Eyach                                    | 48.446111  | 8.781611   | 0.965996   | 26.275     | NA  | YES |
| p20.F10 | NA          | M | 2018 | DEU | Eyach                                    | 48.446111  | 8.781611   | 0.951949   | 27.3486    | NA  | YES |
| p20.G9  | NA          | M | 2018 | DEU | Eyach                                    | 48.446111  | 8.781611   | 0.951606   | 25.8164    | NA  | YES |
| p21.A8  | NA          | M | 2018 | DEU | Eyach                                    | 48.446111  | 8.781611   | 0.951989   | 50.4423    | NA  | YES |
| p21.E3  | NA          | M | 2018 | DEU | Eyach                                    | 48.446111  | 8.781611   | 0.912764   | 42.5976    | NA  | YES |
| p21.F1  | NA          | M | 2018 | DEU | Eyach                                    | 48.446111  | 8.781611   | 0.921125   | 54.2176    | NA  | YES |
| p21.F9  | NA          | M | 2018 | DEU | Eyach                                    | 48.446111  | 8.781611   | 0.951456   | 43.9553    | NA  | YES |
| p22.A8  | NA          | M | 2018 | DEU | Eyach                                    | 48.446111  | 8.781611   | 0.910773   | 42.5346    | NA  | YES |
| p22.B5  | NA          | M | 2018 | DEU | Eyach                                    | 48.446111  | 8.781611   | 0.908795   | 31.8141    | NA  | YES |
| p22.C1  | NA          | M | 2018 | DEU | Eyach                                    | 48.446111  | 8.781611   | 0.910697   | 44.4703    | NA  | YES |
| p22.D1  | NA          | M | 2018 | DEU | Eyach                                    | 48.446111  | 8.781611   | 0.93509    | 9.86993    | NA  | YES |

|         |    |   |      |     |            |           |          |          |         |    |     |
|---------|----|---|------|-----|------------|-----------|----------|----------|---------|----|-----|
| p22.D4  | NA | M | 2018 | DEU | Eyach      | 48.446111 | 8.781611 | 0.901368 | 6.48617 | NA | YES |
| p23.A3  | NA | M | 2018 | DEU | Det-2      | 48.556255 | 9.135424 | 0.922147 | 90.3312 | NA | YES |
| p23.A5  | NA | M | 2018 | DEU | Det-2      | 48.556255 | 9.135424 | 0.355851 | 5.69028 | NA | NO  |
| p23.B4  | NA | M | 2018 | DEU | Det-2      | 48.556255 | 9.135424 | 0.353754 | 10.3529 | NA | NO  |
| p23.B8  | NA | M | 2018 | DEU | Pfrondorf2 | 48.561087 | 9.109294 | 0.915323 | 25.8754 | NA | YES |
| p24.B5  | NA | M | 2018 | DEU | Eyach      | 48.446111 | 8.781611 | 0.906998 | 24.3191 | NA | YES |
| p24.H2  | NA | M | 2018 | DEU | Eyach      | 48.446111 | 8.781611 | 0.919194 | 36.961  | NA | YES |
| p25.A12 | NA | M | 2018 | DEU | Eyach      | 48.446111 | 8.781611 | 0.904389 | 8.27369 | NA | YES |
| p25.B2  | NA | M | 2018 | DEU | Eyach      | 48.446111 | 8.781611 | 0.99527  | 9.73957 | NA | YES |
| p25.C11 | NA | M | 2018 | DEU | Eyach      | 48.446111 | 8.781611 | 0.936486 | 7.67613 | NA | NO  |
| p25.C2  | NA | M | 2018 | DEU | Eyach      | 48.446111 | 8.781611 | 0.999957 | 38.9734 | NA | YES |
| p25.D2  | NA | M | 2018 | DEU | Eyach      | 48.446111 | 8.781611 | 0.997331 | 11.0366 | NA | YES |
| p26.B7  | NA | M | 2018 | DEU | Pfrondorf2 | 48.561087 | 9.109294 | 0.918811 | 18.5831 | NA | YES |
| p26.C10 | NA | M | 2018 | DEU | Det-2      | 48.556255 | 9.135424 | 0.532614 | 7.27294 | NA | NO  |
| p26.D6  | NA | M | 2018 | DEU | Eyach      | 48.446111 | 8.781611 | 0.907977 | 10.1768 | NA | YES |
| p26.E7  | NA | M | 2018 | DEU | Pfrondorf2 | 48.561087 | 9.109294 | 0.915118 | 26.4647 | NA | YES |
| p26.F6  | NA | M | 2018 | DEU | Pfrondorf2 | 48.561087 | 9.109294 | 0.263831 | 1.09767 | NA | NO  |
| p27.C5  | NA | M | 2018 | DEU | Pfrondorf2 | 48.561087 | 9.109294 | 0.33096  | 4.98267 | NA | NO  |
| p27.D6  | NA | M | 2018 | DEU | Pfrondorf2 | 48.561087 | 9.109294 | 0.915116 | 62.9111 | NA | YES |
| p27.F2  | NA | M | 2018 | DEU | Pfrondorf2 | 48.561087 | 9.109294 | 0.908864 | 30.4347 | NA | YES |
| p3.A3   | NA | M | 2018 | DEU | Eyach      | 48.446111 | 8.781611 | 0.999479 | 12.1995 | NA | YES |
| p3.F12  | NA | M | 2018 | DEU | Eyach      | 48.446111 | 8.781611 | 0.999766 | 64.6266 | NA | YES |
| p3.F8   | NA | M | 2018 | DEU | Eyach      | 48.446111 | 8.781611 | 0.910145 | 14.5013 | NA | NO  |
| p3.G11  | NA | M | 2018 | DEU | Eyach      | 48.446111 | 8.781611 | 0.405107 | 35.7165 | NA | NO  |
| p3.G9   | NA | M | 2018 | DEU | Eyach      | 48.446111 | 8.781611 | 0.936757 | 40.7657 | NA | YES |
| p4.A6   | NA | M | 2018 | DEU | Eyach      | 48.446111 | 8.781611 | 0.999359 | 11.257  | NA | YES |
| p4.A8   | NA | M | 2018 | DEU | Eyach      | 48.446111 | 8.781611 | 0.317566 | 8.57523 | NA | NO  |
| p4.C5   | NA | M | 2018 | DEU | Eyach      | 48.446111 | 8.781611 | 0.281958 | 2.19208 | NA | NO  |
| p4.D11  | NA | M | 2018 | DEU | Eyach      | 48.446111 | 8.781611 | 0.329928 | 7.72875 | NA | NO  |
| p4.D2   | NA | M | 2018 | DEU | Eyach      | 48.446111 | 8.781611 | 0.903089 | 43.5342 | NA | YES |
| p4.E5   | NA | M | 2018 | DEU | Eyach      | 48.446111 | 8.781611 | 0.905147 | 9.07888 | NA | YES |
| p4.E6   | NA | M | 2018 | DEU | Eyach      | 48.446111 | 8.781611 | 0.907851 | 26.4274 | NA | YES |
| p4.H3   | NA | M | 2018 | DEU | Det-2      | 48.556255 | 9.135424 | 0.359271 | 11.1964 | NA | NO  |



|              |    |   |      |     |                     |           |          |          |         |    |     |
|--------------|----|---|------|-----|---------------------|-----------|----------|----------|---------|----|-----|
| p5.A5        | NA | M | 2018 | DEU | Eyach               | 48.446111 | 8.781611 | 0.569164 | 20.9644 | NA | NO  |
| p5.C1        | NA | M | 2018 | DEU | Eyach               | 48.446111 | 8.781611 | 0.940631 | 83.5842 | NA | YES |
| p5.C3        | NA | M | 2018 | DEU | Eyach               | 48.446111 | 8.781611 | 0.911686 | 61.8474 | NA | YES |
| p5.D5        | NA | M | 2018 | DEU | Eyach               | 48.446111 | 8.781611 | 0.908126 | 47.1102 | NA | YES |
| p5.F2        | NA | M | 2018 | DEU | Eyach               | 48.446111 | 8.781611 | 0.355109 | 10.8067 | NA | NO  |
| p5.H11       | NA | M | 2018 | DEU | Eyach               | 48.446111 | 8.781611 | 0.912223 | 24.6014 | NA | YES |
| p6.A10       | NA | M | 2018 | DEU | Eyach               | 48.446111 | 8.781611 | 0.967914 | 86.1443 | NA | YES |
| p6.B5        | NA | M | 2018 | DEU | Eyach               | 48.446111 | 8.781611 | 0.377432 | 8.17665 | NA | NO  |
| p6.B9        | NA | M | 2018 | DEU | Eyach               | 48.446111 | 8.781611 | 0.915641 | 40.9034 | NA | NO  |
| p6.D10       | NA | M | 2018 | DEU | Eyach               | 48.446111 | 8.781611 | 0.362251 | 6.29957 | NA | NO  |
| p6.E9        | NA | M | 2018 | DEU | Eyach               | 48.446111 | 8.781611 | 0.348102 | 5.45088 | NA | NO  |
| p6.F1        | NA | M | 2018 | DEU | Det-2               | 48.556255 | 9.135424 | 0.441901 | 14.1066 | NA | NO  |
| p6.G2        | NA | M | 2018 | DEU | Det-2               | 48.556255 | 9.135424 | 0.591204 | 22.8581 | NA | NO  |
| p6.G3        | NA | M | 2018 | DEU | Det-2               | 48.556255 | 9.135424 | 0.374359 | 12.0216 | NA | NO  |
| p7.F2        | NA | M | 2018 | DEU | Eyach               | 48.446111 | 8.781611 | 0.420044 | 6.6193  | NA | NO  |
| p7.G11       | NA | M | 2018 | DEU | Eyach               | 48.446111 | 8.781611 | 0.922476 | 63.4571 | NA | YES |
| p8.B3        | NA | M | 2018 | DEU | Eyach               | 48.446111 | 8.781611 | 0.999766 | 72.1507 | NA | YES |
| p8.B9        | NA | M | 2018 | DEU | Eyach               | 48.446111 | 8.781611 | 0.921803 | 46.3749 | NA | YES |
| p8.C7        | NA | M | 2018 | DEU | Eyach               | 48.446111 | 8.781611 | 0.933317 | 51.4209 | NA | YES |
| p8.D11       | NA | M | 2018 | DEU | Eyach               | 48.446111 | 8.781611 | 0.432979 | 9.92024 | NA | NO  |
| p8.E4        | NA | M | 2018 | DEU | Eyach               | 48.446111 | 8.781611 | 0.917628 | 39.6076 | NA | YES |
| p8.G10       | NA | M | 2018 | DEU | Det-2               | 48.556255 | 9.135424 | 0.460138 | 12.253  | NA | NO  |
| p8.G2        | NA | M | 2018 | DEU | Det-2               | 48.556255 | 9.135424 | 0.450816 | 8.26752 | NA | NO  |
| p8.H7        | NA | M | 2018 | DEU | Det-2               | 48.556255 | 9.135424 | 0.899835 | 67.821  | NA | YES |
| p9.C4        | NA | M | 2018 | DEU | Eyach               | 48.446111 | 8.781611 | 0.946827 | 40.897  | NA | NO  |
| p9.H10       | NA | M | 2018 | DEU | Eyach               | 48.446111 | 8.781611 | 0.469617 | 11.8808 | NA | NO  |
| BAV2572      | NA | M | 2013 | USA | Virgina             | NA        | NA       | NA       | NA      | NA | NO  |
| CDRTc14      | NA | M | 2013 | AUT | Steinberg-Dör<br>fl | 47.4N     | 16.47E   | NA       | NA      | NA | NO  |
| ICMP882<br>0 | NA | M | 2010 | NZL | NA                  | NA        | NA       | NA       | NA      | NA | NO  |
| ICMP327<br>2 | NA | M | 1975 | NZL | Riverhead           | NA        | NA       | NA       | NA      | NA | NO  |
| CFBP159<br>0 | NA | M | 1974 | FRA | Vaucluse            | NA        | NA       | NA       | NA      | NA | NO  |

|         |    |   |      |     |                             |            |                |    |    |    |    |
|---------|----|---|------|-----|-----------------------------|------------|----------------|----|----|----|----|
| DSM669  |    |   |      |     |                             |            |                |    |    |    |    |
| 4       | NA | M | 1930 | CHE | NA                          | NA         | NA             | NA | NA | NA | NO |
| CH40913 |    |   |      |     |                             |            |                |    |    |    |    |
| 2       | NA | M | 2013 | USA | Boston,<br>Massachusetts    | 42.22N     | 71.7W          | NA | NA | NA | NO |
| LMCA84  |    |   |      |     |                             |            |                |    |    |    |    |
| 60      | NA | M | 2008 | USA | Lake<br>Michigan<br>College | 42.090114N | 86.393408<br>W | NA | NA | NA | NO |
| SV1779  | NA | M | 2017 | USA | Scott Valley,<br>California | NA         | NA             | NA | NA | NA | NO |
| T157    | NA | M | 2019 | USA | Tulelake,<br>California     | NA         | NA             | NA | NA | NA | NO |

**Table S4: Key Resources Table**

| REAGENT or RESOURCE                           | SOURCE              | IDENTIFIER                                                                                          |
|-----------------------------------------------|---------------------|-----------------------------------------------------------------------------------------------------|
| <b>Deposited Data</b>                         |                     |                                                                                                     |
| 1524 <i>Pseudomonas</i> genomes               | Karasov et al. 2018 | ENA: PRJEB24450                                                                                     |
| <b>Experimental Models: Organisms/Strains</b> |                     |                                                                                                     |
| 1524 Modern <i>Pseudomonas</i> strains        | Karasov et al. 2018 | NA                                                                                                  |
| 34 Historic strains                           |                     | In Table S3 (Sample)                                                                                |
| 10 NCBI genomes                               | NCBI                | In Table S3 (Sample)                                                                                |
| p25.A12 $\Delta$ TFA                          |                     |                                                                                                     |
| p25.A12 $\Delta$ TFA +TFA                     | This study          | NA                                                                                                  |
| <b>Software and Algorithms</b>                |                     |                                                                                                     |
| VIBRANT v1.2.1                                | Kieft et al., 2020  | <a href="https://github.com/AnantharamanLab/VIBRANT">https://github.com/AnantharamanLab/VIBRANT</a> |
| Mash v2.2.2                                   | Ondov et al., 2016  | <a href="https://github.com/marbl/Ma">https://github.com/marbl/Ma</a>                               |

|                                            |                                                                                                                                                                                                                                                                                                                                                               |                                                                                                               |
|--------------------------------------------|---------------------------------------------------------------------------------------------------------------------------------------------------------------------------------------------------------------------------------------------------------------------------------------------------------------------------------------------------------------|---------------------------------------------------------------------------------------------------------------|
|                                            |                                                                                                                                                                                                                                                                                                                                                               | <a href="#">sh</a>                                                                                            |
| panX                                       | Ding et al., 2018                                                                                                                                                                                                                                                                                                                                             | <a href="https://github.com/neherlab/pan-genome-analysis">https://github.com/neherlab/pan-genome-analysis</a> |
| pankmer                                    | Aylward et al., 2023                                                                                                                                                                                                                                                                                                                                          | <a href="https://pypi.org/project/pankmer/">https://pypi.org/project/pankmer/</a>                             |
| <u>Product</u>                             | <u>Primers</u>                                                                                                                                                                                                                                                                                                                                                | <u>Size (bp)</u>                                                                                              |
| p25.A12 $\Delta$ TFA attB DNA construction | upstream<br>forward, 5'<br>ggggacaagttgtac<br>aaaaaagcaggctC<br>GCGCGCGTCA<br>TCAATTCTA 3'<br>and upstream<br>reverse 5'<br>TTCAAAGAA<br>CCAGTTAAGG<br>GTATTCATgac<br>ctctag 3';<br>downstream<br>forward, 5'<br>tgcaagcttgCAG<br>GAGTTCACAT<br>GCCTATCG 3'<br>and downstream<br>reverse 5'<br>ggggaccactttgtac<br>aagaaagctgggtG<br>TGCGTGAGCT<br>GGGCAAC 3' | 458bp                                                                                                         |
| Flanking arm screening amplification       | F-5'<br>CGCGCGCGTC<br>ATCAATTCTA<br>3' and R-5'<br>GTGCGTGAGC<br>TGGGCAAC 3'                                                                                                                                                                                                                                                                                  | WT = 946bp<br>KO = 400bp                                                                                      |
| p25.A12 TFA with RE overhangs              | F-5'atgcaagcttA<br>TGCACACAGT<br>ATTAAGCGCT<br>CGC 3' and<br>R-5'ACGAGCT<br>GCCCAAGAC                                                                                                                                                                                                                                                                         | 568bp                                                                                                         |

|  |                         |  |
|--|-------------------------|--|
|  | CTGAggatccact<br>agt 3' |  |
|--|-------------------------|--|

**Table S5. De-novo assembly contigs statistics from reads mapped to the Tailocin region.**

| <b>MAETRIC\SAMPLE</b> | <b>HB0737</b> | <b>HB0766</b> | <b>HB0814</b> |
|-----------------------|---------------|---------------|---------------|
| <b>Total_n</b>        | 10            | 9             | 14            |
| <b>Total_seq_bp</b>   | 23769         | 21573         | 21574         |
| <b>Avg._seq_bp</b>    | 2376.9        | 2397          | 1541          |
| <b>Median_seq_bp</b>  | 2143          | 1665          | 1275.5        |
| <b>N_50_bp</b>        | 2858          | 3405          | 1705          |
| <b>Min_seq_bp</b>     | 583           | 494           | 415           |
| <b>Max_seq_bp</b>     | 5543          | 7935          | 3337          |
